# Supplementary material
Source: PubMed Central journal article supplement (PMC7530095)
Supplement: NIHMS1623132-supplement-Supplementary_Information.pdf [file NIHMS1623132-supplement-Supplementary_Information.pdf]

## Original Research Article

### **Relationship between MLH1, PMS2, MSH2, and MSH6 gene specific alterations and tumor mutational burden (TMB) in 1,057 microsatellite instability-high solid tumors**

Mohamed E. Salem\*<sup>1</sup> MD, J. Nicholas Bodor\*<sup>2</sup> MD, PhD, Alberto Puccini<sup>3,4</sup> MD, Joanne Xiu<sup>5</sup> PhD, Richard M. Goldberg<sup>6</sup> MD, Axel Grothey<sup>7</sup>, W. Michael Korn<sup>5,8</sup> MD, Anthony F. Shields<sup>9</sup> MD, PhD, William M Worilow<sup>1</sup> MD, Edward S. Kim<sup>1</sup> MD, Heinz-Josef Lenz<sup>3</sup> MD, John L. Marshall<sup>10</sup> MD, Michael J. Hall<sup>2</sup> MD, MS

#### **List of materials included in this document**

- 1) Supplementary Figure S1.** Total number of MMR gene mutations identified per tumor
  
- 2) Supplementary Figure S2.** MMR gene mutational patterns among 443 tumors with at least one MMR mutation
  
- 3) Supplementary Figure S3.** Rates of MMR protein loss and MMR mutation examined by gene in tumors with complete MMR IHC and NGS testing (N=418)
  
- 4) Supplementary Table S1.** Tumor mutational burden (TMB) stratified by the presence of an MSH6 mutation and by disease site

### Supplementary Figure S1: Total number of MMR gene mutations identified per tumor

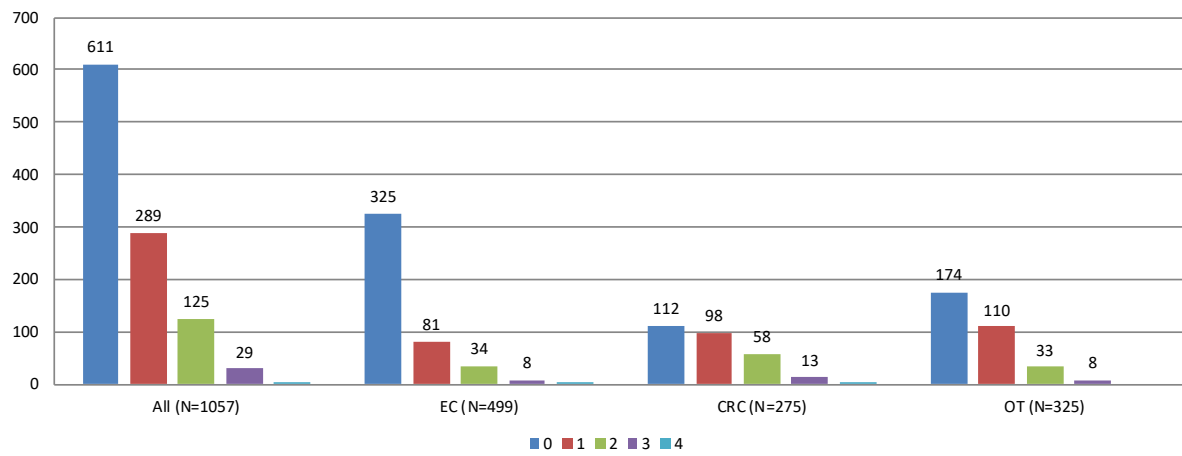

Abbreviations: EC, endometrial cancer; CRC, colorectal cancer; OT, other tumors

**Supplementary Figure S2: MMR gene mutational patterns among 443 tumors with at least one MMR mutation**

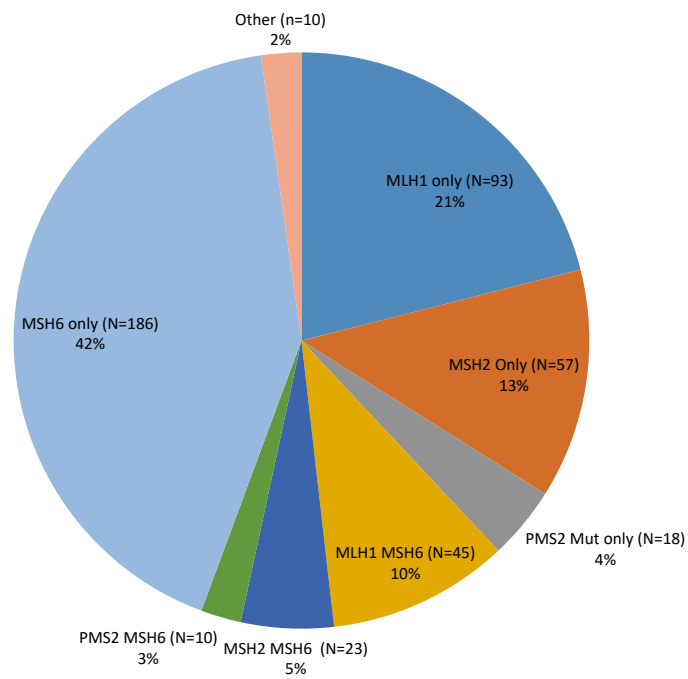

Abbreviations: Mut, mutation

**Supplementary Figure S3: Rates of MMR protein loss and MMR mutation examined by gene in tumors with complete MMR IHC and NGS testing (N=418)**

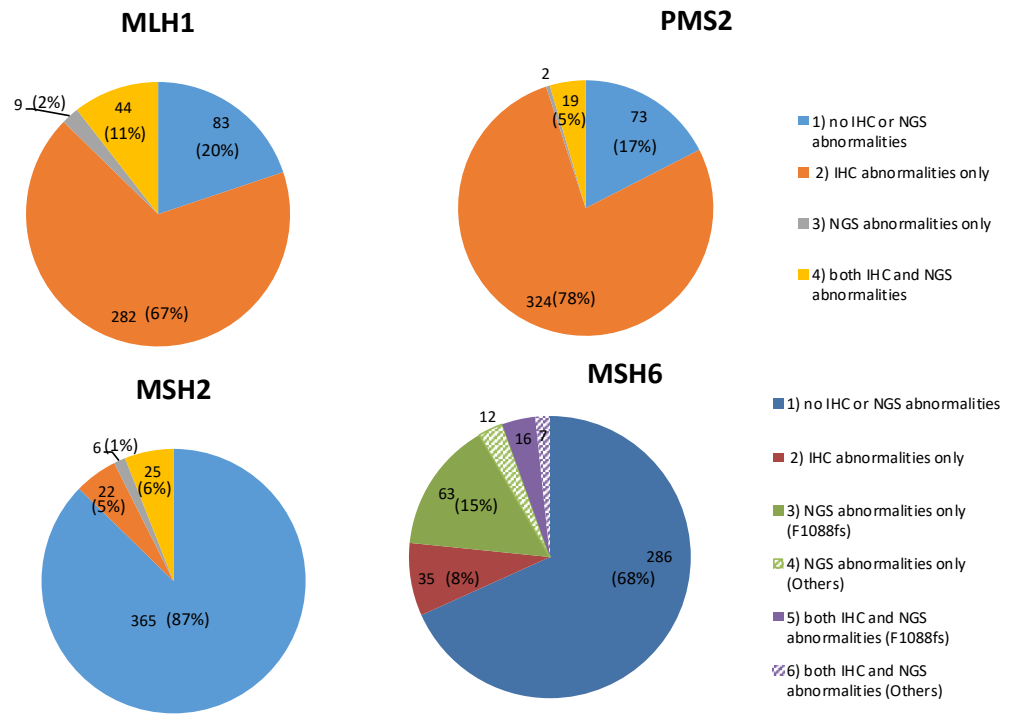

Abbreviations: IHC, immunohistochemistry; NGS, next generation sequencing;

**Supplementary Table S1: Tumor mutational burden (TMB) stratified by the presence of an MSH6 mutation and by disease site**

| All          | All  |           |           | EC   |           |           | CRC  |           |           | Other |           |           |
|--------------|------|-----------|-----------|------|-----------|-----------|------|-----------|-----------|-------|-----------|-----------|
|              | Mean | Lower 95% | Upper 95% | Mean | Lower 95% | Upper 95% | Mean | Lower 95% | Upper 95% | Mean  | Lower 95% | Upper 95% |
| MSH6 1088fs  | 36.3 | 32.1      | 40.6      | 25.8 | 19.6      | 31.9      | 43.2 | 36.8      | 49.6      | 42.7  | 33.0      | 52.4      |
| MSH6 OtherMT | 53.0 | 44.7      | 61.3      | 31.8 | 17.8      | 45.7      | 48.9 | 37.4      | 60.4      | 84.5  | 66.3      | 102.7     |
| MSH6-NoMUT   | 26.0 | 23.8      | 28.2      | 21.7 | 18.7      | 24.6      | 35.0 | 30.6      | 39.4      | 26.0  | 21.7      | 30.3      |
